# Supplementary material for: Cytotoxic Lignan from the Non-Transformed Root Culture of Phyllanthus amarus
Source: MDPI journal article supplement (doi:10.3390/molecules20057915), 2015-04-30
Supplement: s1 [file s1]

# Supplementary Materials

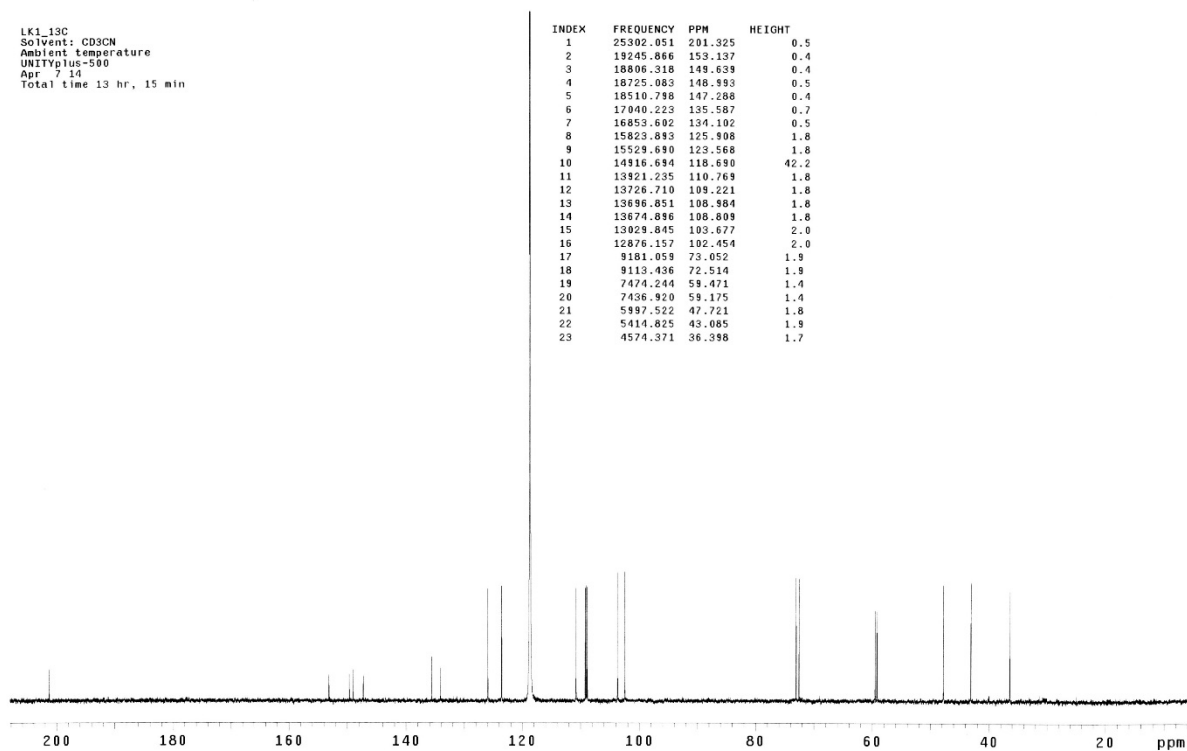

**Figure S1.**  $^{13}\text{C}$ -NMR spectrum of compound **1**.

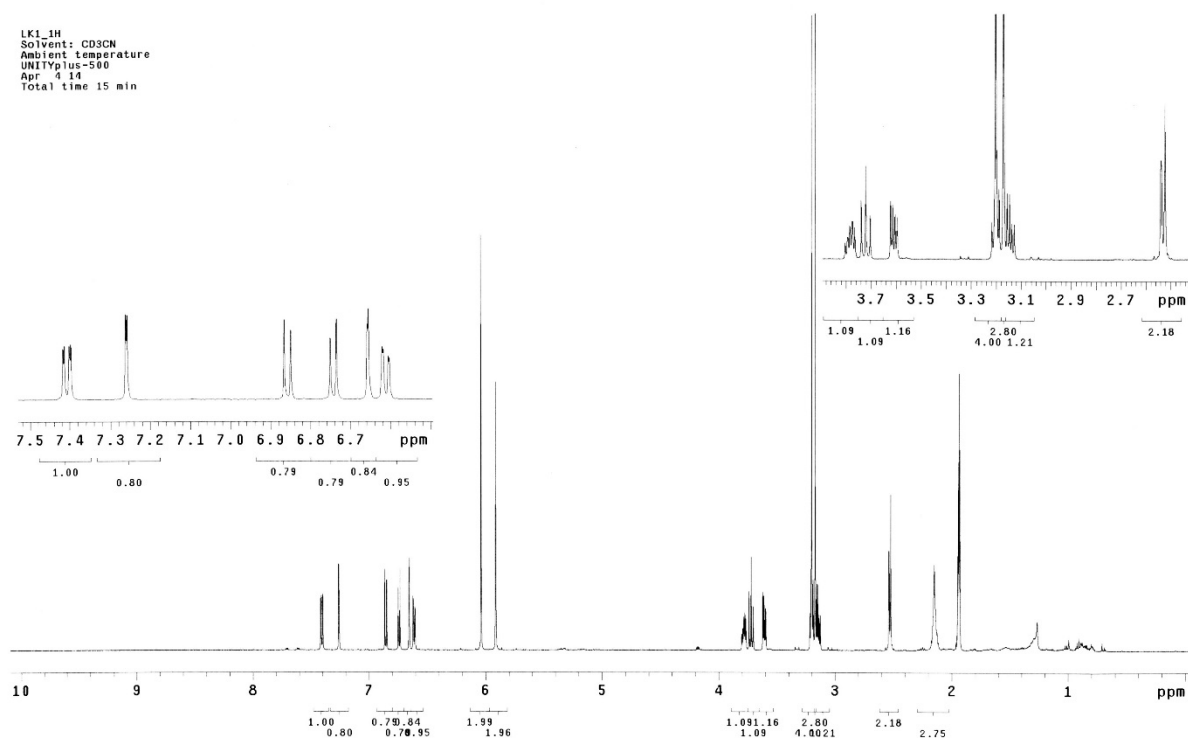

**Figure S2.**  $^1\text{H}$ -NMR spectrum of compound **1**.

LK1\_gcosy  
Solvent: CD3CN  
Ambient temperature  
UNITYplus-500  
Apr 4 14  
Total time 15 min

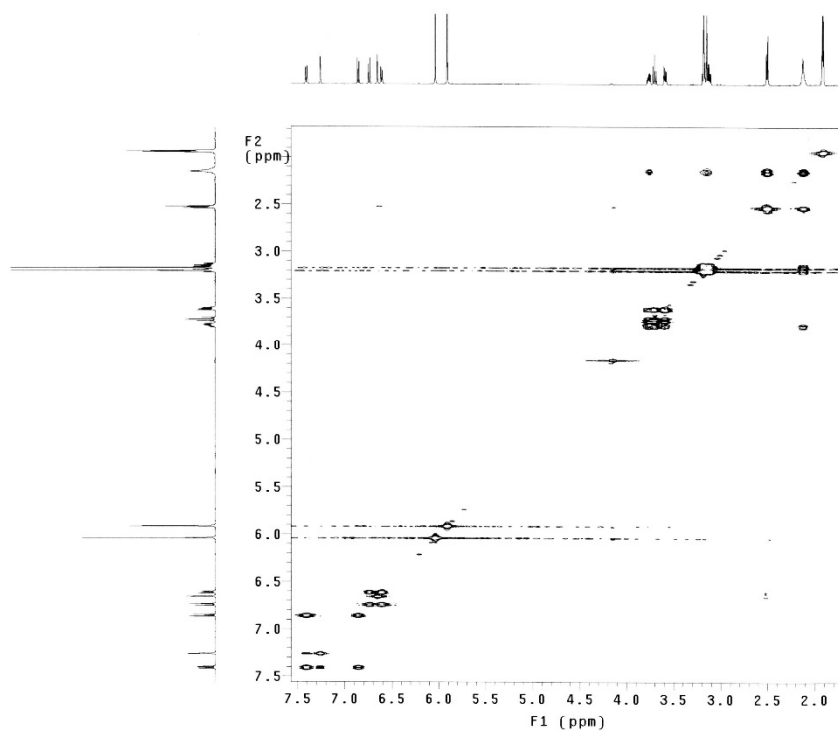

**Figure S3.** COSY spectrum of compound **1**.

LK1\_gmhc  
Solvent: CD3CN  
Ambient temperature  
UNITYplus-500  
Apr 4 14

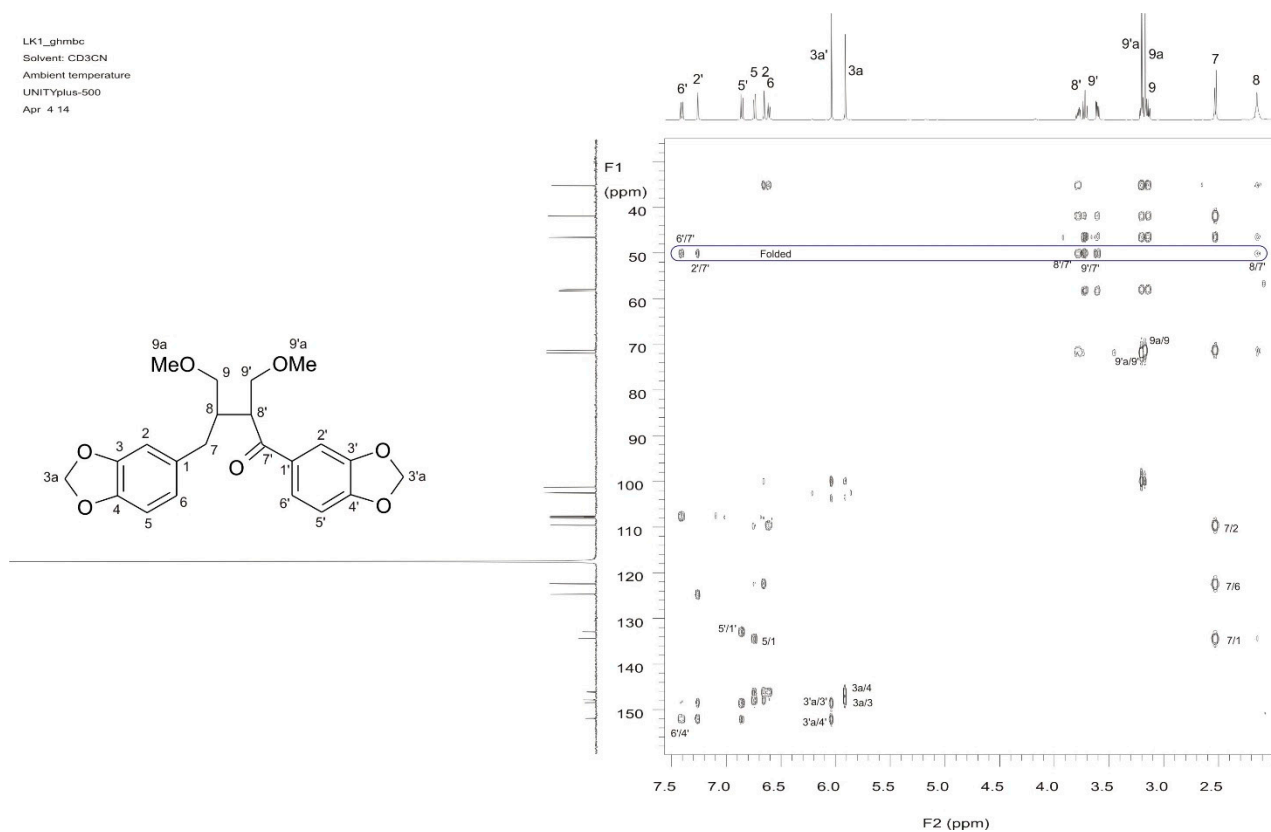

**Figure S4.** HMBC spectrum of compound **1**.

LK1\_ghsqc  
Solvent: CD3CN  
Ambient temperature  
UNITYplus-500  
Apr 4 14  
Total time 1 hr

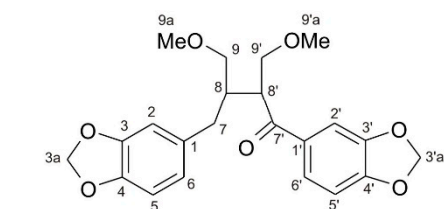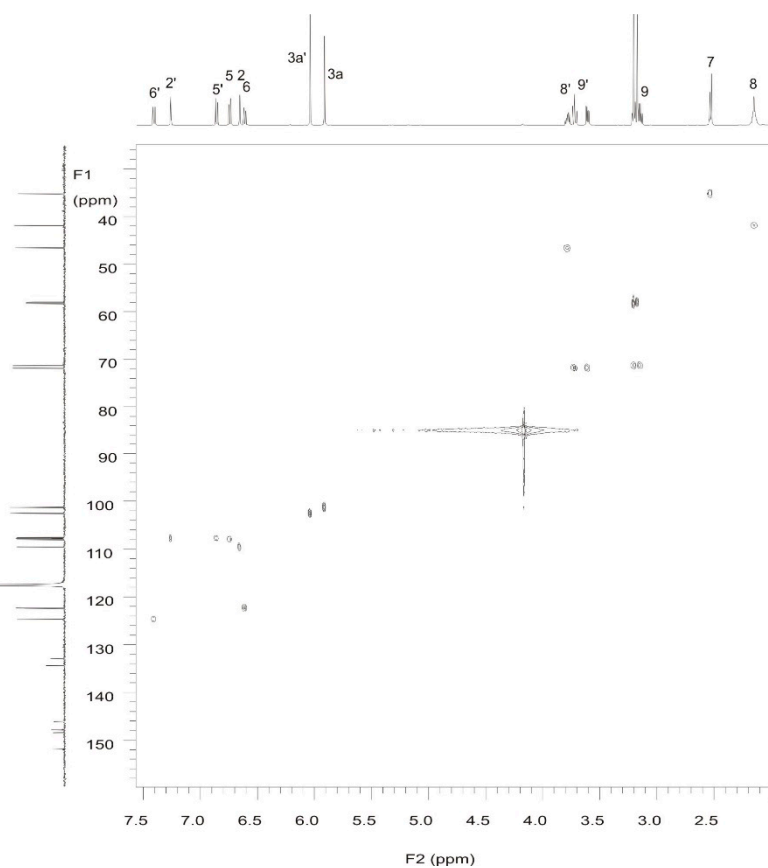

**Figure S5.** HSQC spectrum of compound **1**.

LK1\_roesy  
Solvent: CD3CN  
Ambient temperature  
UNITYplus-500  
Apr 4 14

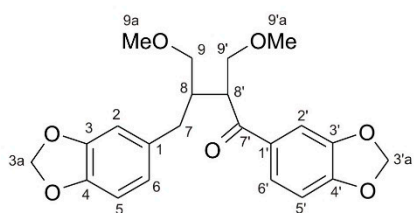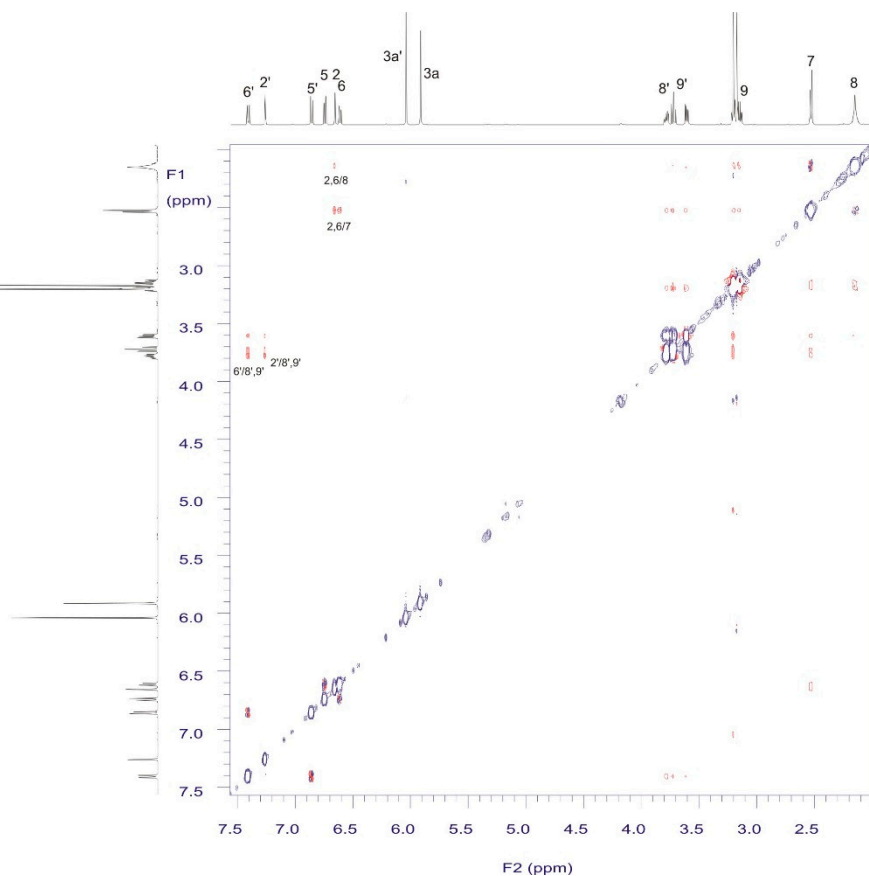

**Figure S6.** ROESY spectrum of compound **1**.

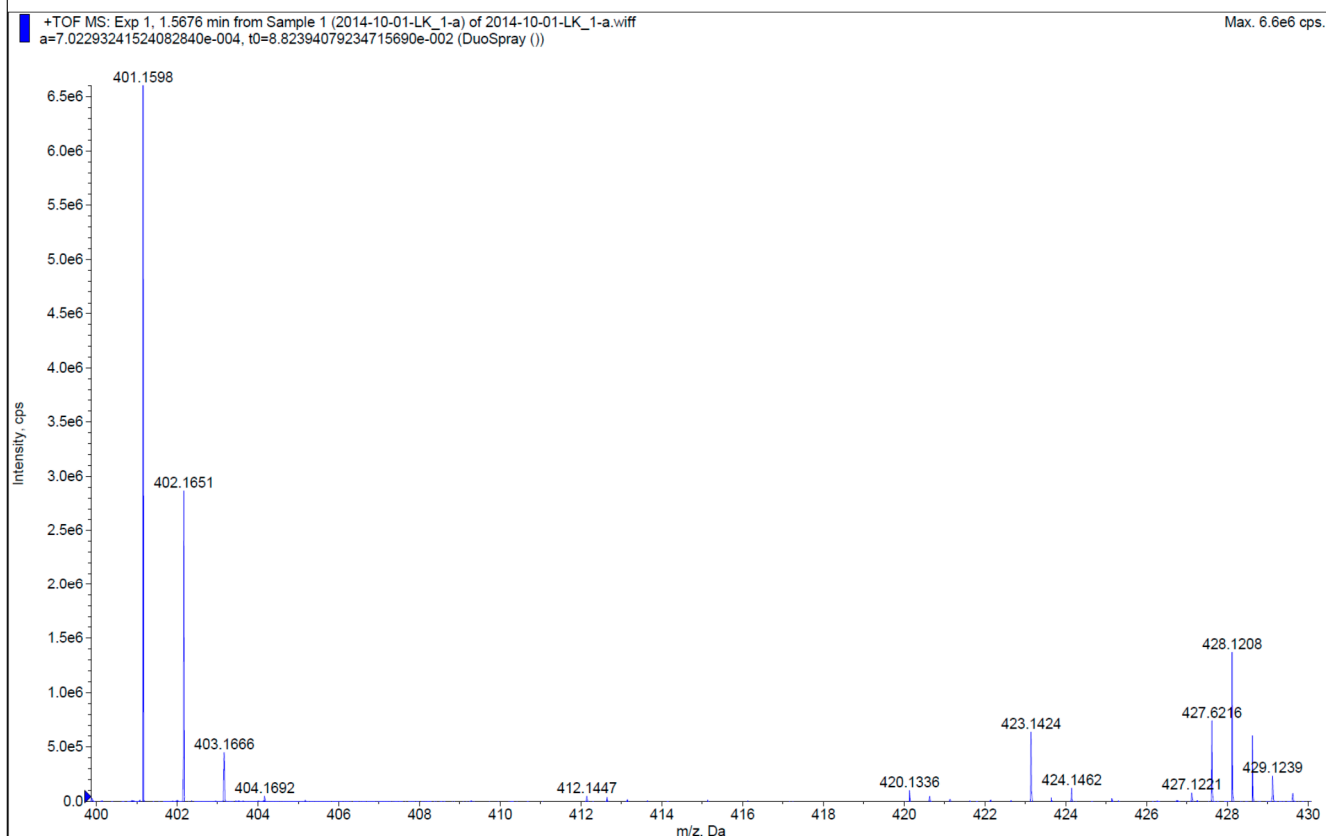

**Figure S7.** MS spectrum of compound **1**.

### The dose-response curves for cytotoxicity data.

Cytotoxicity of methanol extract from non-transformed roots of *P. amarus* against HeLa cell line

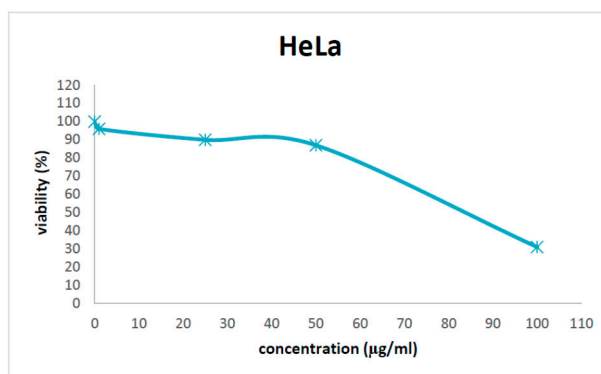

Cytotoxicity of compound **1** – 7'-oxocubebin dimethyl ether against HeLa and HaCaT cell lines.

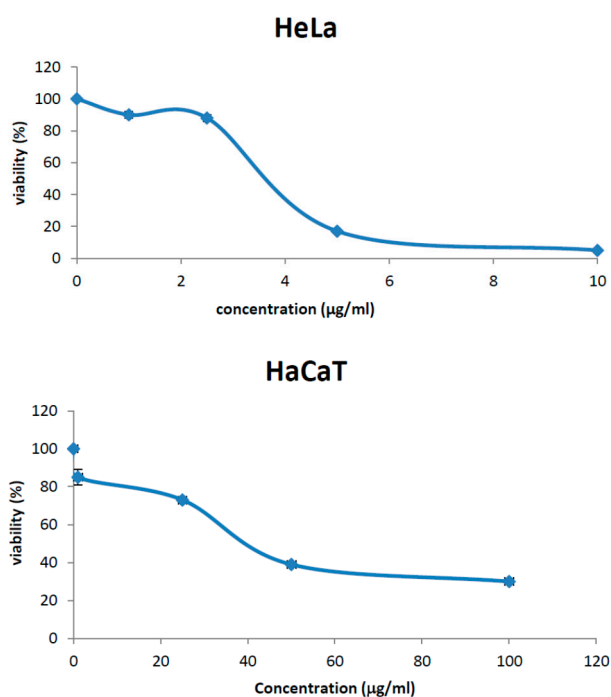

**Figure S8.** Dose-response curves for cytotoxicity of compound **1**.
